# Supplementary figures and images for: The Relationship between Fat Mass Percentage and Glucose Metabolism in Children and Adolescents: A Systematic Review and Meta-Analysis
Source: MDPI journal article supplement (doi:10.3390/nu14112272), 2022-05-28

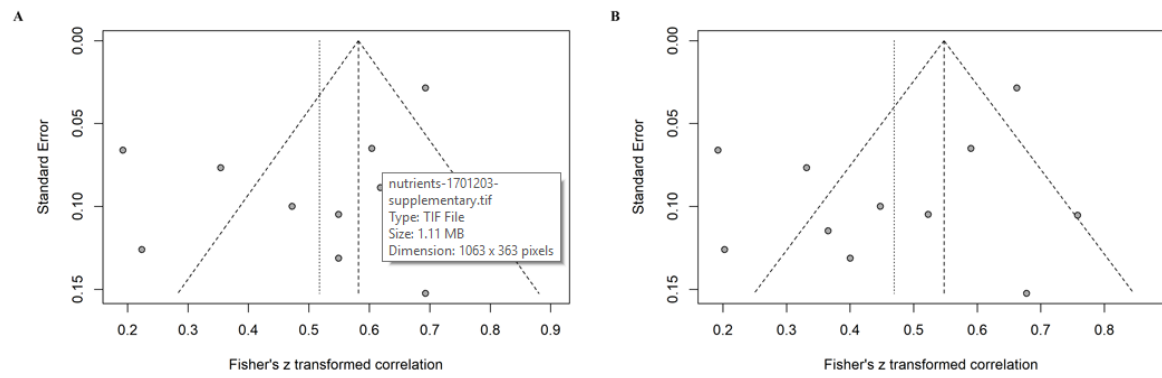

Figure S1. The funnel plots of the associations of FMP with INS (**A**) and HOMA-IR (**B**).

Supplement: s1 [file s1]
